# Supplementary material for: Diamondoid and square-grid networks based on bent wheel-and-axle diols
Source: Royal Society of Chemistry journal article supplement (doi:10.1039/c0ce00173b), 2010-01-01
Supplement: c0ce00173b.pdf [file c0ce00173b.pdf]

## Electronic Supplementary Information

### *Diamondoid and square-grid networks based on bent wheel-and-axle diols*

*Alessia Bacchi, Mauro Carcelli, Tiziana Chiodo, Paolo Pelagatti*

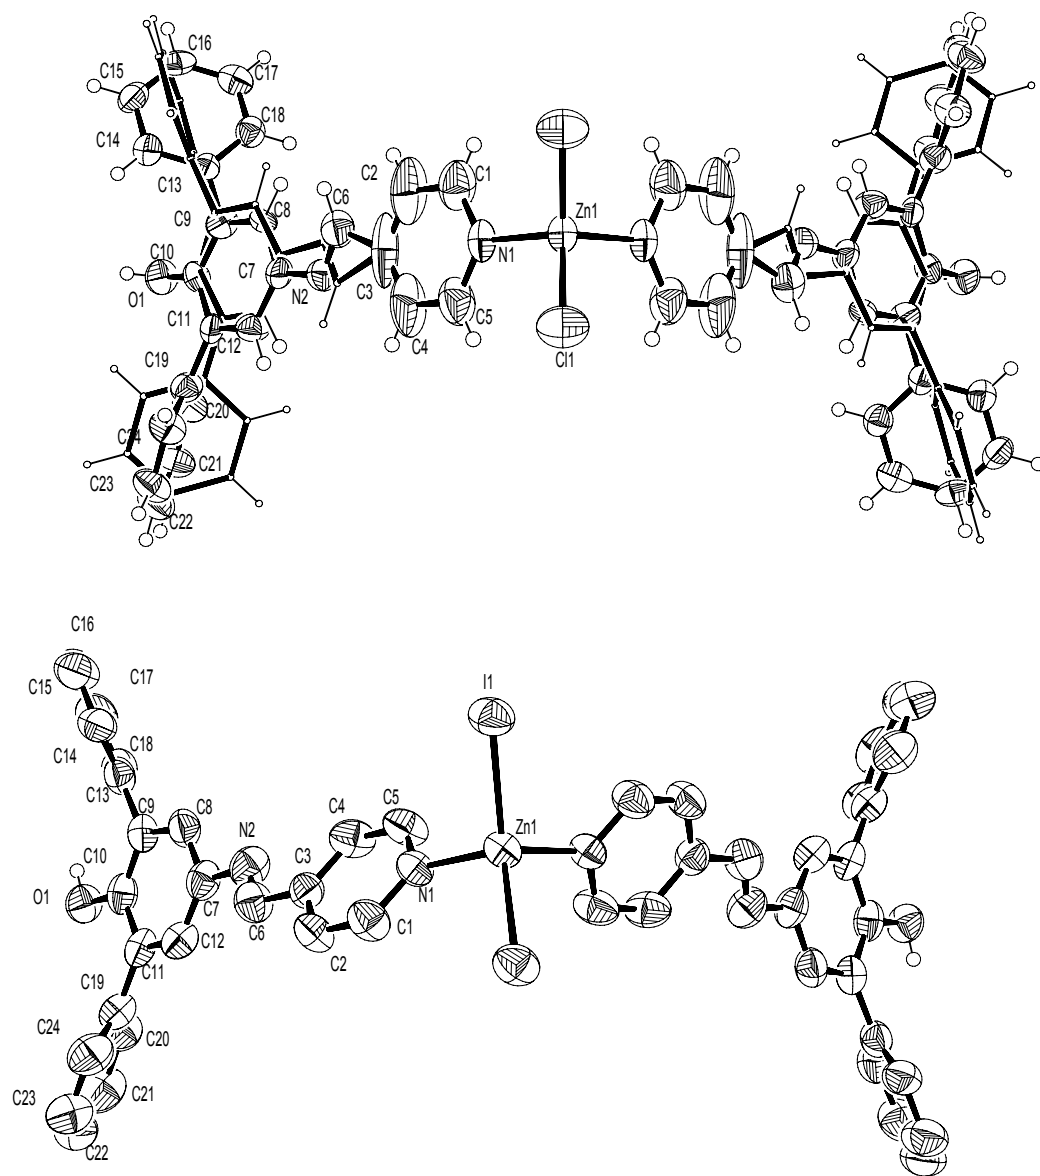

**Figure.** Similarity between the molecular structure of **1** (disordered population in sticks, top) and **3** (bottom), with thermal ellipsoids at the 50% level.
